# Supplementary material
Source: PubMed Central journal article supplement (PMC5860661)
Supplement: NIHMS949867-supplement-supplement_1.pdf [file NIHMS949867-supplement-supplement_1.pdf]

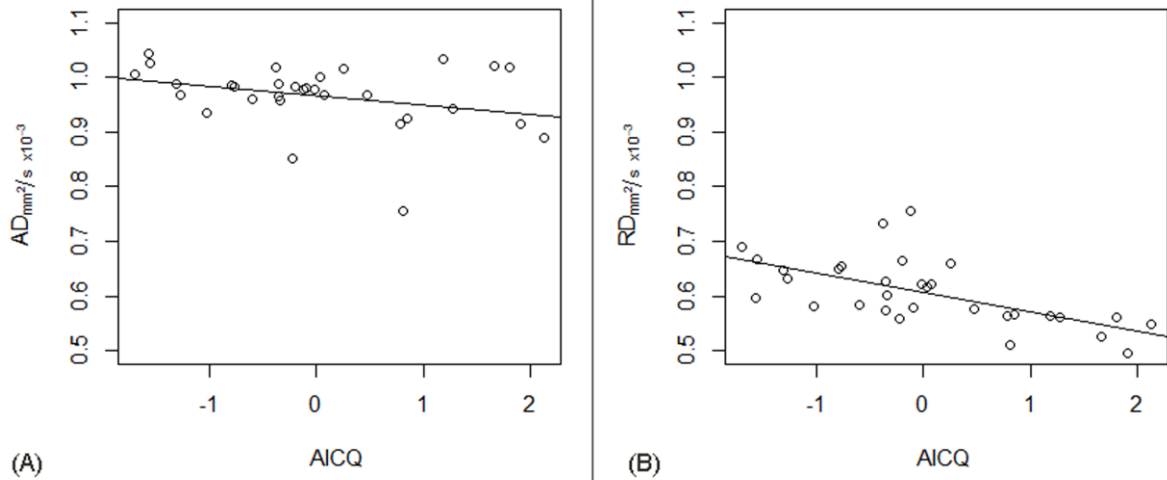

**Supplementary Figure 1.** Scatter plots of Axial Diffusivity (AD) and Radial Diffusivity (RD) with Adult Interpersonal Competence Questionnaire (AICQ) within the first five clusters reported in Table 1. The values of both (A) AD (Pearson's coefficient -0.306,  $p=0.093$ ) and (B) RD (Pearson's correlation coefficient -0.621,  $p=0.00019$ ) are anticorrelated to AICQ. To improve readability, values of AD and RD are multiplied by 1000.
